# Supplementary material for: Influence of FTO variants on obesity, inflammation and cardiovascular disease risk biomarkers in Spanish children: a case–control multicentre study
Source: PubMed Central journal article supplement (PMC3866940; doi:10.1186/1471-2350-14-123), 2013-12-01
Supplement: 1471-2350-14-123-S1.pdf [file 1471-2350-14-123-S1.pdf]

## Additional files

**Additional Table 1** Description of the genotyped polymorphisms.

| <b>Polymorphism</b> | <b>Position</b> | <b>MAF</b> | <b>Alleles (M/m)</b> | <b>HWE P</b> | <b>Call rate (%)</b> |
|---------------------|-----------------|------------|----------------------|--------------|----------------------|
| rs9939609           | Intron 1        | 0.444      | T/A                  | 0.682        | 99.4                 |
| rs9928094           | Intron 1        | 0.462      | A/G                  | 0.789        | 99.8                 |
| rs9930333           | Intron 1        | 0.463      | T/G                  | 0.687        | 99.4                 |
| rs9935401           | Intron 1        | 0.439      | G/A                  | 1            | 99.3                 |
| rs10852521          | Intron 1        | 0.446      | C/T                  | 0.606        | 99.8                 |
| rs1861868           | Intron 1        | 0.466      | A/G                  | 0.797        | 99.8                 |
| rs7205986           | Intron 1        | 0.084      | A/G                  | 0.246        | 99.8                 |
| rs11643744          | Intron 1        | 0.267      | A/G                  | 0.256        | 99.8                 |
| rs7203521           | Intron 1        | 0.383      | A/G                  | 1            | 100                  |
| rs12445162          | Intron 1        | 0.075      | G/A                  | 0.681        | 100                  |
| rs11075986          | Intron 1        | 0.084      | C/G                  | 0.201        | 100                  |
| rs17818902          | Intron 3        | 0.245      | T/G                  | 0.855        | 99.8                 |
| rs3826169           | Intron 3        | 0.228      | T/C                  | 1            | 100                  |
| rs8061518           | Intron 3        | 0.309      | A/G                  | 0.889        | 97.9                 |
| rs7190053           | Intron 3        | 0.183      | C/T                  | 1            | 99.1                 |
| rs2111114           | Intron 4        | 0.212      | A/G                  | 0.843        | 99.8                 |
| rs8044353           | Intron 4        | 0.053      | G/A                  | 1            | 99.8                 |
| rs10521303          | Intron 5        | 0.439      | C/A                  | 0.069        | 99.1                 |
| rs1558756           | Intron 6        | 0.444      | C/T                  | 0.119        | 100                  |
| rs16952623          | Intron 6        | 0.132      | T/C                  | 0.388        | 99.4                 |
| rs7194336           | Intron 7        | 0.441      | G/T                  | 0.199        | 100                  |

|            |          |       |     |              |      |
|------------|----------|-------|-----|--------------|------|
| rs9929152  | Intron 7 | 0.277 | A/G | <b>0.040</b> | 99.6 |
| rs16952649 | Intron 7 | 0.122 | C/T | <b>0.008</b> | 100  |
| rs10852525 | Intron 7 | 0.106 | G/A | 0.159        | 99.1 |
| rs8053966  | Intron 7 | 0.184 | T/C | <b>0.007</b> | 99.6 |
| rs2111113  | Intron 7 | 0.074 | G/C | 0.330        | 99.6 |
| rs16952624 | Exon 7   | 0.001 | C/T | 1            | 99.6 |
| rs1136002  | Intron 8 | 0.317 | T/C | 0.462        | 100  |
| rs2075202  | Intron 8 | 0.025 | T/G | 1            | 100  |
| rs2540781  | Intron 8 | 0.128 | C/A | 0.345        | 100  |
| rs12932373 | Intron 8 | 0.138 | C/T | 0.589        | 99.4 |
| rs1008400  | Intron 8 | 0.459 | C/T | 0.153        | 99.6 |
| rs1125337  | Intron 8 | 0.450 | A/T | <b>0.027</b> | 99.8 |
| rs17833492 | Intron 8 | 0.313 | C/A | 0.466        | 99.6 |
| rs7203181  | Intron 8 | 0.339 | C/A | 0.780        | 100  |
| rs7194907  | Intron 8 | 0.479 | T/C | 0.091        | 98.9 |
| rs2689248  | Intron 8 | 0.480 | C/A | 0.368        | 99.4 |
| rs13334214 | Intron 8 | 0.201 | C/T | 0.228        | 98.3 |
| rs1558687  | Intron 8 | 0.242 | C/T | 0.864        | 99.4 |
| rs4784351  | Intron 8 | 0.270 | A/G | 0.742        | 97.6 |
| rs12596638 | Intron 8 | 0.136 | G/A | 1            | 99.8 |
| rs8056299  | Intron 8 | 0.429 | A/G | 0.696        | 99.8 |
| rs7194243  | Intron 8 | 0.219 | C/T | 0.337        | 100  |
| rs6499656  | Intron 8 | 0.130 | G/C | 0.356        | 100  |
| rs7199716  | Intron 8 | 0.394 | C/T | 0.893        | 99.8 |
| rs8054364  | Intron 8 | 0.146 | C/G | <b>0.040</b> | 99.8 |

|            |          |       |     |       |      |
|------------|----------|-------|-----|-------|------|
| rs8049235  | Intron 8 | 0.393 | G/A | 0.285 | 99.6 |
| rs17225435 | Intron 8 | 0.115 | A/G | 1     | 100  |
| rs7200579  | Intron 8 | 0.060 | C/G | 0.536 | 100  |
| rs697771   | Intron 8 | 0.427 | C/T | 0.362 | 100  |
| rs7191513  | Intron 8 | 0.424 | G/A | 0.241 | 100  |
| rs8049933  | Intron 8 | 0.108 | C/T | 0.284 | 99.3 |

---

HWE P: Hardy-Weinberg equilibrium (p for the control group); FAM: minor allele frequency.

**Additional Table 2** Association of rs9928094 with biomarkers of inflammation and cardiovascular disease risk in obese children.

|                                          | <b>AA</b>    | <b>AG</b>    | <b>GG</b>    | <b>β (95%CI)</b>     | <b>P</b>     |
|------------------------------------------|--------------|--------------|--------------|----------------------|--------------|
| <b>n</b>                                 | 155          | 263          | 115          |                      |              |
| <b>Anthropometric factors</b>            |              |              |              |                      |              |
| Height (m)                               | 1.38 ± 0.01  | 1.39 ± 0.01  | 1.39 ± 0.01  | -0.003 (-0.01, 0.00) | 0.167        |
| Weight (kg)                              | 42.2 ± 1.4   | 45.9 ± 1.1   | 48.8 ± 2.0   | 3.14 (1.37, 4.91)    | <b>0.001</b> |
| BMI (kg/m <sup>2</sup> )                 | 21.55 ± 0.49 | 23.02 ± 0.36 | 24.12 ± 0.61 | 1.26 (0.53, 1.98)    | <b>0.001</b> |
| BMI z-score                              | 1.43 ± 0.17  | 1.88 ± 0.13  | 2.25 ± 0.20  | 0.44 (0.18, 0.69)    | <b>0.001</b> |
| Waist circumference (cm)                 | 70.43 ± 1.40 | 73.16 ± 1.01 | 76.45 ± 1.61 | 2.77 (0.03, 5.51)    | <b>0.048</b> |
| <b>Clinical and metabolic biomarkers</b> |              |              |              |                      |              |
| Systolic BP (mm Hg)                      | 104 ± 1      | 105 ± 1      | 105 ± 1      | 0.90 (-0.91, 2.72)   | 0.330        |
| Diastolic BP (mm Hg)                     | 63 ± 1       | 65 ± 1       | 65 ± 1       | 0.81 (-0.67, 2.28)   | 0.285        |
| Glucose (mg/dl)                          | 85 ± 1       | 84 ± 0       | 84 ± 1       | -0.37 (-1.22, 0.49)  | 0.399        |
| Insulin (mU/l)                           | 8.81 ± 0.66  | 8.86 ± 0.43  | 9.35 ± 0.65  | 0.02 (-0.02, 0.05)   | 0.349        |
| HOMA-IR                                  | 1.88 ± 0.15  | 1.87 ± 0.10  | 1.98 ± 0.14  | 0.01 (-0.02, 0.05)   | 0.443        |
| Triacylglycerol (mg/dl)                  | 68 ± 3       | 63 ± 2       | 68 ± 3       | -0.64 (-0.45, 3.27)  | 0.748        |

|                                               |               |               |               |                      |              |
|-----------------------------------------------|---------------|---------------|---------------|----------------------|--------------|
| Apo-AI (mg/dl)                                | 143 ± 2       | 140 ± 2       | 136 ± 3       | -3.41 (-6.72, -0.09) | <b>0.044</b> |
| Cholesterol (mg/dl)                           | 169 ± 3       | 166 ± 2       | 168 ± 2       | -0.001 (-0.01, 0.01) | 0.811        |
| HDL-c (mg/dl)                                 | 58 ± 1        | 57 ± 1        | 55 ± 1        | -0.84 (-2.65, 0.96)  | 0.360        |
| Adiponectin (mg/l)                            | 25.94 ± 0.99  | 25.15 ± 0.73  | 24.22 ± 1.06  | -0.50 (-1.93, 0.93)  | 0.496        |
| Resistin (µg/l)                               | 10.28 ± 0.46  | 10.91 ± 0.35  | 11.15 ± 0.51  | 0.50 (-0.19, 1.19)   | 0.158        |
| Leptin (µg/l)                                 | 13.69 ± 1.29  | 14.50 ± 0.84  | 15.55 ± 1.38  | 1.00 (-0.78, 2.78)   | 0.273        |
| <b>Inflammatory biomarkers</b>                |               |               |               |                      |              |
| C-reactive protein (mg/l)                     | 2.02 ± 0.30   | 2.31 ± 0.24   | 2.59 ± 0.48   | 0.31 (-0.19, 0.81)   | 0.228        |
| IL-6 (ng/l)                                   | 5.73 ± 0.93   | 5.66 ± 0.62   | 6.67 ± 1.21   | 0.53 (-0.83, 1.89)   | 0.448        |
| IL-8 (ng/l)                                   | 1.87 ± 0.16   | 1.90 ± 0.14   | 1.95 ± 0.22   | 0.06 (-0.21, 0.34)   | 0.645        |
| TNFα (ng/l)                                   | 3.58 ± 0.17   | 3.69 ± 0.13   | 3.30 ± 0.18   | -0.07 (-0.32, 0.18)  | 0.568        |
| <b>Cardiovascular disease risk biomarkers</b> |               |               |               |                      |              |
| MMP-9 (µg/l)                                  | 82.36 ± 4.57  | 80.95 ± 3.67  | 94.46 ± 5.61  | 0.04 (0.003, 0.07)   | <b>0.034</b> |
| MPO (µg/l)                                    | 17.77 ± 2.16  | 17.67 ± 1.61  | 17.63 ± 1.75  | 0.14 (-2.91, 3.19)   | 0.929        |
| sE-Selectin (µg/l)                            | 26.06 ± 1.17  | 28.43 ± 1.06  | 26.38 ± 1.33  | 0.61 (-1.27, 2.50)   | 0.525        |
| sICAM-1 (mg/l)                                | 0.162 ± 0.005 | 0.168 ± 0.005 | 0.160 ± 0.005 | 0.004 (-0.01, 0.01)  | 0.993        |

|                     |              |              |              |                    |       |
|---------------------|--------------|--------------|--------------|--------------------|-------|
| Active PAI-1 (μg/l) | 8.39 ± 0.60  | 8.64 ± 0.52  | 10.04 ± 0.88 | 0.80 (-0.22, 1.82) | 0.127 |
| Total PAI-1 (μg/l)  | 23.04 ± 1.34 | 22.22 ± 0.94 | 26.72 ± 1.90 | 0.02 (-0.01, 0.06) | 0.223 |

---

CI: Confidence interval; BMI: body mass index; BP: blood pressure; HOMA-IR: homeostasis model assessment for insulin resistance; HDL-c: high-density lipoprotein cholesterol; IL: interleukin; TNF-α: tumor necrosis factor alpha; MMP-9: metalloproteinase-9; MPO: myeloperoxidase; sICAM-1: soluble intracellular adhesion molecule-1, PAI-1: plasminogen activator inhibitor. β Coefficients represent the change in absolute traits values of each additional risk allele. General linear models were used to examine associations, P adjusted by age and sex.

**Additional Table 3** Association of rs9930333 with biomarkers of inflammation and cardiovascular disease risk in obese children.

|                                          | <b>TT</b>    | <b>TG</b>    | <b>GG</b>    | <b>β (95% CI)</b>    | <b>P</b>     |
|------------------------------------------|--------------|--------------|--------------|----------------------|--------------|
| <b>n</b>                                 | 154          | 262          | 115          |                      |              |
| <b>Anthropometric factors</b>            |              |              |              |                      |              |
| Height (m)                               | 1.38 ± 0.01  | 1.39 ± 0.01  | 1.39 ± 0.01  | -0.003 (-0.01, 0.00) | 0.192        |
| Weight (kg)                              | 42.4 ± 1.4   | 46.0 ± 1.1   | 48.5 ± 2.0   | 3.07 (1.31, 4.84)    | <b>0.001</b> |
| BMI (kg/m <sup>2</sup> )                 | 21.60 ± 0.49 | 23.09 ± 0.36 | 24.03 ± 0.61 | 1.23 (0.52, 1.96)    | <b>0.001</b> |
| BMI z-score                              | 1.44 ± 0.17  | 1.90 ± 0.13  | 2.23 ± 0.20  | 0.43 (0.18, 0.69)    | <b>0.001</b> |
| Waist circumference (cm)                 | 70.54 ± 1.41 | 73.31 ± 1.02 | 76.30 ± 1.61 | 2.73 (-0.003, 5.47)  | 0.051        |
| <b>Clinical and metabolic biomarkers</b> |              |              |              |                      |              |
| Systolic BP (mm Hg)                      | 104 ± 1      | 105 ± 1      | 105 ± 1      | 0.88 (-0.93, 2.69)   | 0.339        |
| Diastolic BP (mm Hg)                     | 63 ± 1       | 65 ± 1       | 65 ± 1       | 0.83 (-0.65, 2.30)   | 0.272        |
| Glucose (mg/dl)                          | 85 ± 1       | 84 ± 0       | 84 ± 1       | -0.37 (-1.22, 0.49)  | 0.402        |
| Insulin (mU/l)                           | 8.83 ± 0.67  | 8.89 ± 0.43  | 9.31 ± 0.65  | 0.02 (-0.02, 0.05)   | 0.400        |
| HOMA-IR                                  | 1.89 ± 0.15  | 1.88 ± 0.10  | 1.97 ± 0.14  | 0.01 (-0.02, 0.05)   | 0.499        |
| Triacylglycerols (mg/dl)                 | 68 ± 3       | 63 ± 2       | 68 ± 3       | -0.42 (-4.32, 3.48)  | 0.034        |

|                                               |               |               |               |                      |              |
|-----------------------------------------------|---------------|---------------|---------------|----------------------|--------------|
| Apo-AI (mg/dl)                                | 143 ± 2       | 141 ± 2       | 135 ± 3       | -3.59 (-6.90, -0.29) | <b>0.033</b> |
| Cholesterol (mg/dl)                           | 169 ± 3       | 167 ± 2       | 168 ± 2       | -0.002 (-0.01, 0.01) | 0.728        |
| HDL-c (mg/dl)                                 | 57 ± 1        | 57 ± 1        | 55 ± 1        | -0.97 (-2.77, 0.83)  | 0.293        |
| Adiponectin (mg/l)                            | 25.77 ± 0.98  | 25.37 ± 0.75  | 23.78 ± 1.01  | -0.73 (-2.16, 0.70)  | 0.319        |
| Resistin (µg/l)                               | 10.28 ± 0.46  | 10.95 ± 0.35  | 11.10 ± 0.51  | 0.45 (-0.23, 1.14)   | 0.198        |
| Leptin (µg/l)                                 | 13.76 ± 1.29  | 14.56 ± 0.84  | 15.56 ± 1.38  | 0.98 (-0.80, 2.75)   | 0.283        |
| <b>Inflammatory biomarkers</b>                |               |               |               |                      |              |
| C-reactive protein (mg/l)                     | 2.03 ± 0.30   | 2.31 ± 0.24   | 2.60 ± 0.48   | 0.32 (-0.18, 0.82)   | 0.371        |
| IL-6 (ng/l)                                   | 5.74 ± 0.93   | 5.67 ± 0.62   | 6.68 ± 1.21   | 0.51 (-0.84, 1.87)   | 0.461        |
| IL-8 (ng/l)                                   | 1.86 ± 0.16   | 1.90 ± 0.15   | 1.95 ± 0.22   | 0.06 (-0.21, 0.33)   | 0.656        |
| TNFα (ng/l)                                   | 3.57 ± 0.17   | 3.70 ± 0.13   | 3.32 ± 0.18   | -0.08 (-0.32, 0.17)  | 0.552        |
| <b>Cardiovascular disease risk biomarkers</b> |               |               |               |                      |              |
| MMP-9 (µg/l)                                  | 81.61 ± 4.54  | 80.95 ± 3.71  | 96.34 ± 5.60  | 0.04 (0.006, 0.07)   | <b>0.021</b> |
| MPO (µg/l)                                    | 17.65 ± 2.17  | 17.78 ± 1.62  | 17.57 ± 1.75  | 0.07 (-2.97, 3.12)   | 0.962        |
| sE-Selectin (µg/l)                            | 26.06 ± 1.17  | 28.43 ± 1.06  | 26.38 ± 1.33  | 0.56 (-1.33, 2.44)   | 0.562        |
| sICAM-1 (mg/l)                                | 0.162 ± 0.005 | 0.169 ± 0.005 | 0.159 ± 0.005 | -0.000 (-0.01, 0.01) | 0.953        |



|                     |              |              |              |                    |       |
|---------------------|--------------|--------------|--------------|--------------------|-------|
| Active PAI-1 (µg/l) | 8.40 ± 0.60  | 8.69 ± 0.52  | 10.06 ± 0.88 | 0.79 (-0.23, 1.81) | 0.129 |
| Total PAI-1 (µg/l)  | 23.02 ± 1.35 | 22.13 ± 0.94 | 27.04 ± 1.90 | 0.03 (-0.01, 0.06) | 0.187 |

---

CI: Confidence interval; BMI: body mass index; BP: blood pressure; HOMA-IR: homeostasis model assessment for insulin resistance; HDL-c: high-density lipoprotein cholesterol; IL: interleukin; TNF- $\alpha$ : tumor necrosis factor alpha; MMP-9: metalloproteinase-9; MPO: myeloperoxidase; sICAM-1: soluble intracellular adhesion molecule-1, PAI-1: plasminogen activator inhibitor.  $\beta$  Coefficients represent the change in absolute traits values of each additional risk allele. General linear models were used to examine associations, P adjusted by age and sex.

**Additional Table 4** Association of rs9935401 with biomarkers of inflammation and cardiovascular disease risk in obese children.

|                                          | <b>GG</b>    | <b>AG</b>    | <b>AA</b>    | <b>β (95%CI)</b>      | <b>P</b>         |
|------------------------------------------|--------------|--------------|--------------|-----------------------|------------------|
| <b>n</b>                                 | 167          | 261          | 102          |                       |                  |
| <b>Anthropometric factors</b>            |              |              |              |                       |                  |
| Height (m)                               | 1.38 ± 0.01  | 1.39 ± 0.01  | 1.40 ± 0.02  | -0.003 (-0.01, 0.001) | 0.115            |
| Weight (kg)                              | 42.1 ± 1.4   | 45.9 ± 1.1   | 50.1 ± 2.2   | 3.44 (1.66, 5.22)     | <b>&lt;0.001</b> |
| BMI (kg/m <sup>2</sup> )                 | 21.56 ± 0.47 | 23.08 ± 0.37 | 24.51 ± 0.64 | 1.37 (0.65, 2.10)     | <b>&lt;0.001</b> |
| BMI z-score                              | 1.42 ± 0.16  | 1.93 ± 0.13  | 2.32 ± 0.22  | 0.47 (0.22, 0.73)     | <b>&lt;0.001</b> |
| Waist circumference (cm)                 | 70.29 ± 1.35 | 73.35 ± 1.01 | 77.46 ± 1.71 | 3.37 (0.62, 6.14)     | <b>0.017</b>     |
| <b>Clinical and metabolic biomarkers</b> |              |              |              |                       |                  |
| Systolic BP (mm Hg)                      | 104 ± 1      | 105 ± 1      | 107 ± 1      | 1.19 (-0.65, 3.02)    | 0.205            |
| Diastolic BP (mm Hg)                     | 63 ± 1       | 65 ± 1       | 66 ± 1       | 1.39 (-0.10, 2.88)    | 0.068            |
| Glucose (mg/dl)                          | 85 ± 1       | 84 ± 0       | 84 ± 1       | -0.42 (-1.28, 0.44)   | 0.342            |
| Insulin (mU/l)                           | 8.78 ± 0.62  | 8.78 ± 0.44  | 9.78 ± 0.71  | 0.02 (-0.01, 0.05)    | 0.209            |
| HOMA-IR                                  | 66 ± 3       | 64 ± 2       | 68 ± 4       | 0.34 (-3.61, 4.29)    | 0.866            |
| Triacylglycerols (mg/dl)                 | 1.88 ± 0.14  | 1.86 ± 0.10  | 2.07 ± 0.16  | 0.02 (-0.02, 0.05)    | 0.286            |

|                                               |               |               |               |                      |       |
|-----------------------------------------------|---------------|---------------|---------------|----------------------|-------|
| Apo-AI (mg/dl)                                | 143 ± 2       | 141 ± 2       | 135 ±         | -3.04 (-6.38, 0.31)  | 0.076 |
| Cholesterol (mg/dl)                           | 168 ± 2       | 166 ± 2       | 170 ± 2       | 0.003 (-0.01, 0.01)  | 0.584 |
| HDL-c (mg/dl)                                 | 58 ± 1        | 57 ± 1        | 55 ± 1        | -1.04 (-2.86, 0.79)  | 0.266 |
| Adiponectin (mg/l)                            | 26.09 ± 0.95  | 24.80 ± 0.73  | 24.16 ± 1.10  | -0.67 (-2.11, 0.78)  | 0.366 |
| Resistin (µg/l)                               | 10.30 ± 0.43  | 10.85 ± 0.36  | 11.43 ± 0.55  | 0.59 (-0.10, 1.29)   | 0.096 |
| Leptin (µg/l)                                 | 13.29 ± 1.20  | 14.68 ± 0.84  | 16.29 ± 1.52  | 1.51 (-0.28, 3.30)   | 0.100 |
| <b>Inflammatory biomarkers</b>                |               |               |               |                      |       |
| C-reactive protein (mg/l)                     | 2.05 ± 0.29   | 2.29 ± 0.23   | 2.77 ± 0.53   | 0.38 (-0.12, 1.89)   | 0.140 |
| IL-6 (ng/l)                                   | 5.56 ± 0.87   | 6.00 ± 0.70   | 6.19 ± 1.05   | 0.44 (-0.93, 1.82)   | 0.528 |
| IL-8 (ng/l)                                   | 1.86 ± 0.15   | 1.96 ± 0.15   | 1.83 ± 0.21   | 0.03 (-0.24, 0.31)   | 0.819 |
| TNFα (ng/l)                                   | 3.52 ± 0.16   | 3.69 ± 0.13   | 3.33 ± 0.20   | -0.01 (-0.26, 0.24)  | 0.962 |
| <b>Cardiovascular disease risk biomarkers</b> |               |               |               |                      |       |
| MMP-9 (µg/l)                                  | 82.52 ± 4.42  | 82.49 ± 3.73  | 92.82 ± 6.05  | 0.03 (-0.004, 0.07)  | 0.080 |
| MPO (µg/l)                                    | 17.65 ± 2.02  | 17.92 ± 1.63  | 17.65 ± 1.88  | 0.27 (-2.81, 3.35)   | 0.865 |
| sE-Selectin (µg/l)                            | 26.18 ± 1.12  | 28.25 ± 1.07  | 26.64 ± 1.40  | 0.74 (-1.16, 2.64)   | 0.448 |
| sICAM-1 (mg/l)                                | 0.162 ± 0.005 | 0.169 ± 0.005 | 0.158 ± 0.006 | 0.0003 (-0.01, 0.01) | 0.951 |

|                     |              |              |              |                    |       |
|---------------------|--------------|--------------|--------------|--------------------|-------|
| Active PAI-1 (µg/l) | 8.41 ± 0.58  | 8.62 ± 0.52  | 10.35 ± 0.97 | 0.90 (-0.13, 1.93) | 0.089 |
| Total PAI-1 (µg/l)  | 23.26 ± 1.31 | 22.18 ± 0.92 | 26.84 ± 2.09 | 0.02 (-0.02, 0.06) | 0.313 |

---

CI: Confidence interval; BMI: body mass index; BP: blood pressure; HOMA-IR: homeostasis model assessment for insulin resistance; HDL-c: high-density lipoprotein cholesterol; IL: interleukin; TNF- $\alpha$ : tumor necrosis factor alpha; MMP-9: metalloproteinase-9; MPO: myeloperoxidase; sICAM-1: soluble intracellular adhesion molecule-1, PAI-1: plasminogen activator inhibitor.  $\beta$  Coefficients represent the change in absolute traits values of each additional risk allele. General linear models were used to examine associations, P adjusted by age and sex.
